# Supplementary material
Source: PubMed Central journal article supplement (PMC2902461)

## **Supplementary Material**

### **Supplemental Table 1**

Codeset details listing official gene name, accession number, gene family and probe sequence.

### **Supplemental Figure 1**

Probe specific background. The background for each probe was determined in four nCounter assays with no RNA added (red, green, light and dark blue dots). The genes, plotted on the abscissa, are arranged by increasing mean (black dots).

### **Supplemental Figure 2**

High resolution expression profiles for all 172 genes included in the codeset. Genes are listed in alphabetical order.

## Probe Specific Background

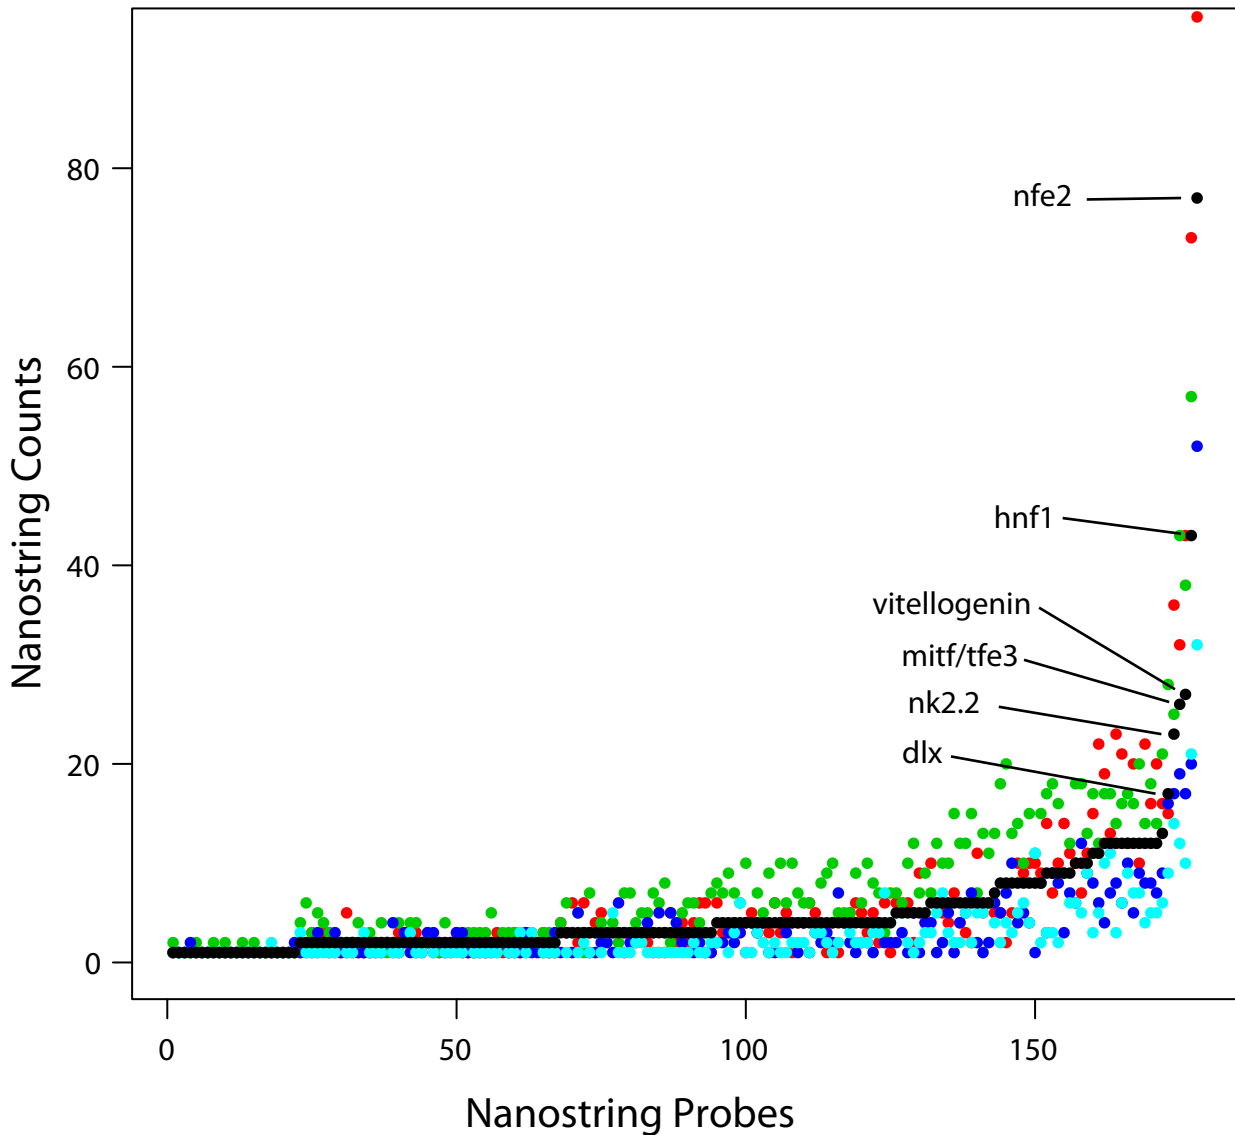

FigureS2

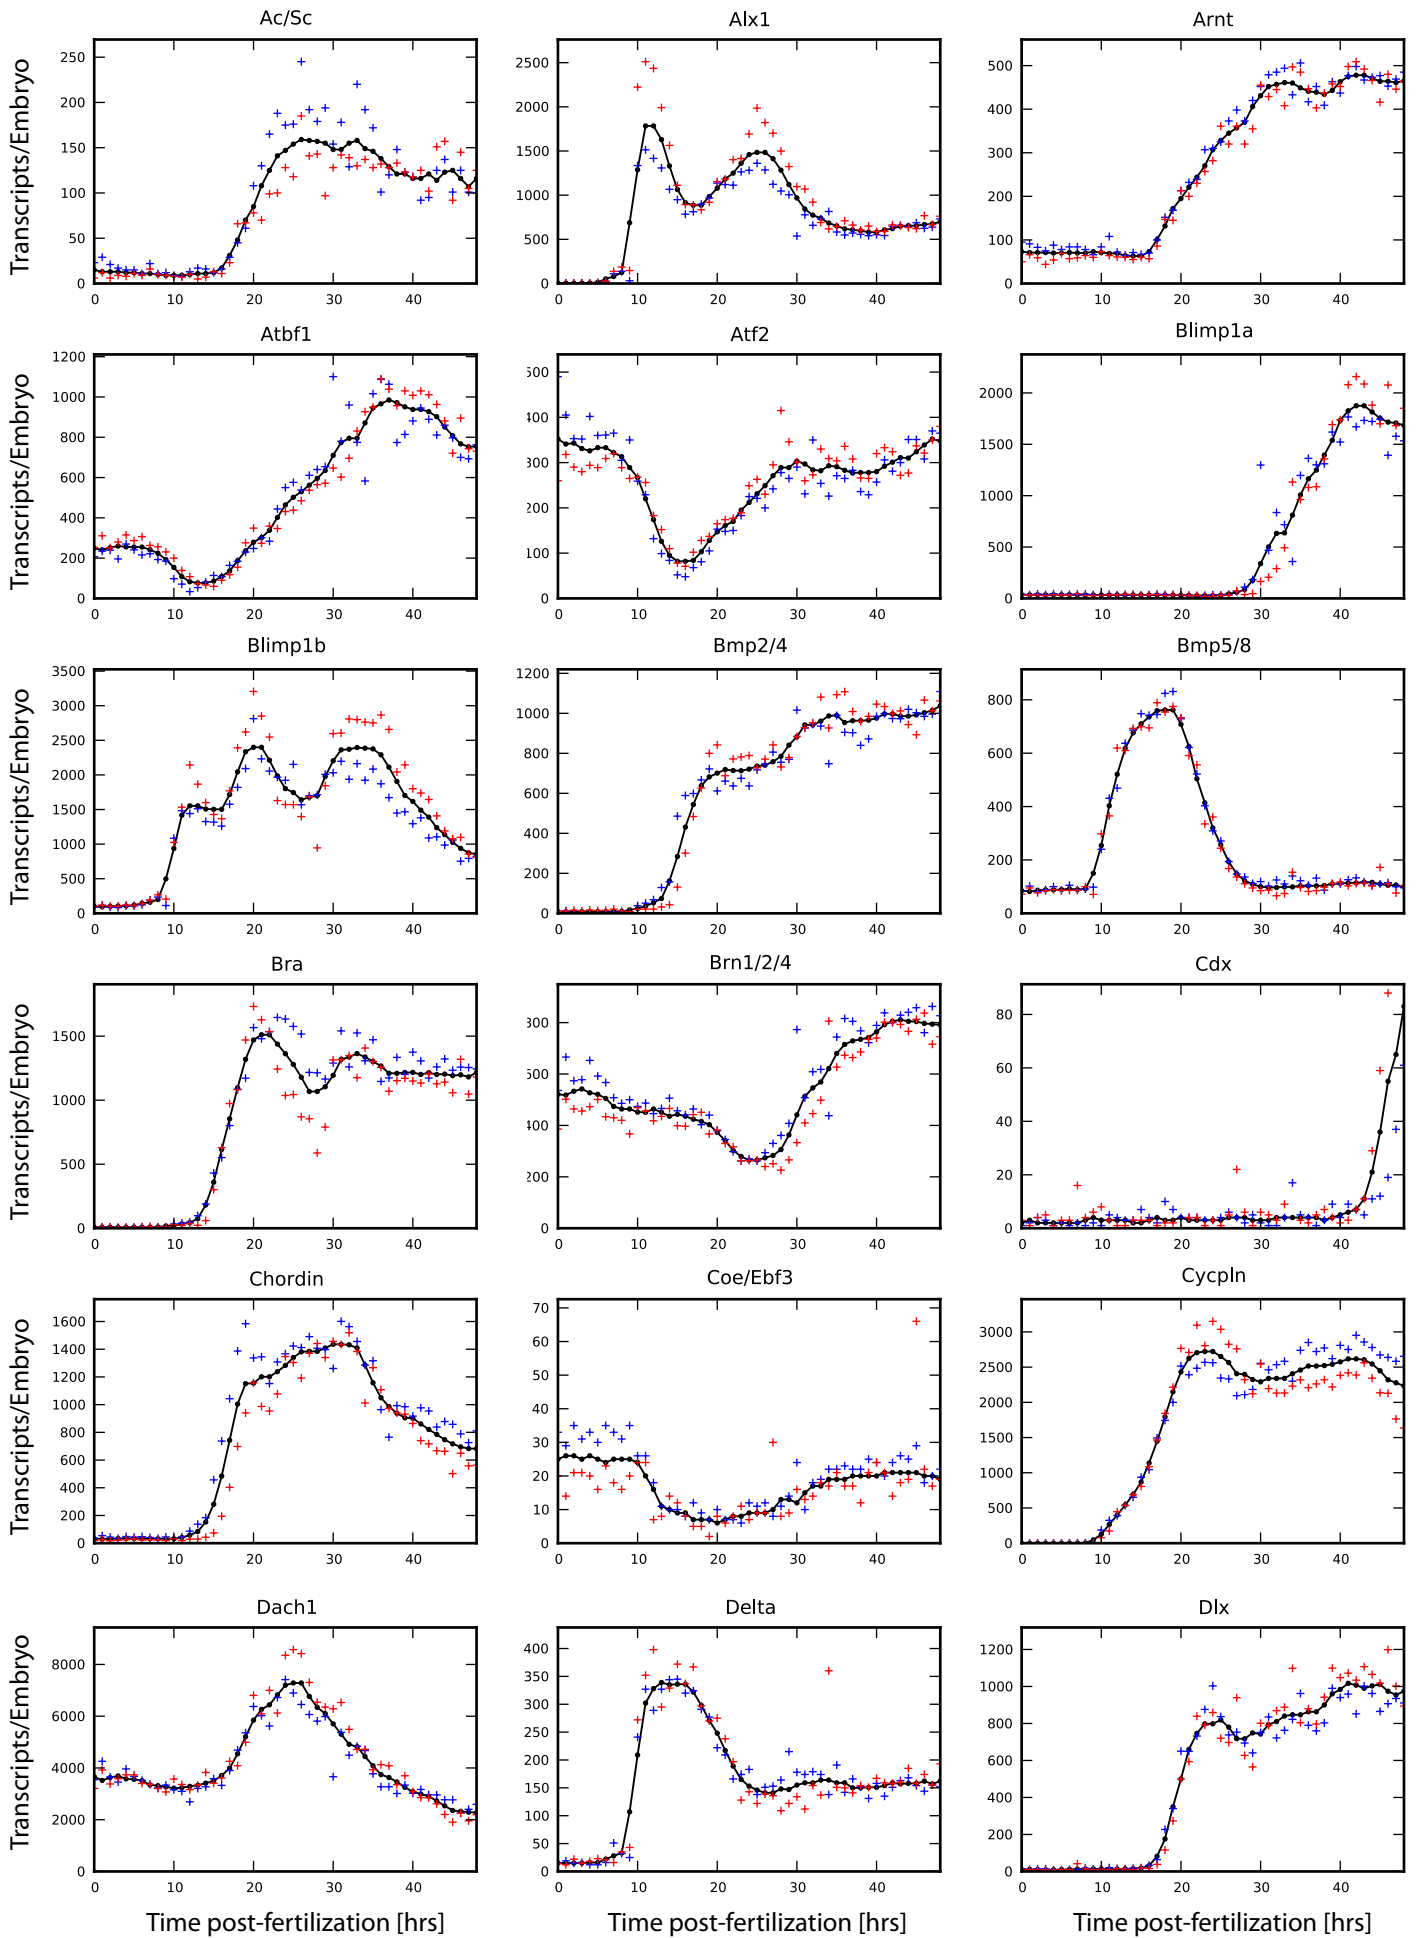

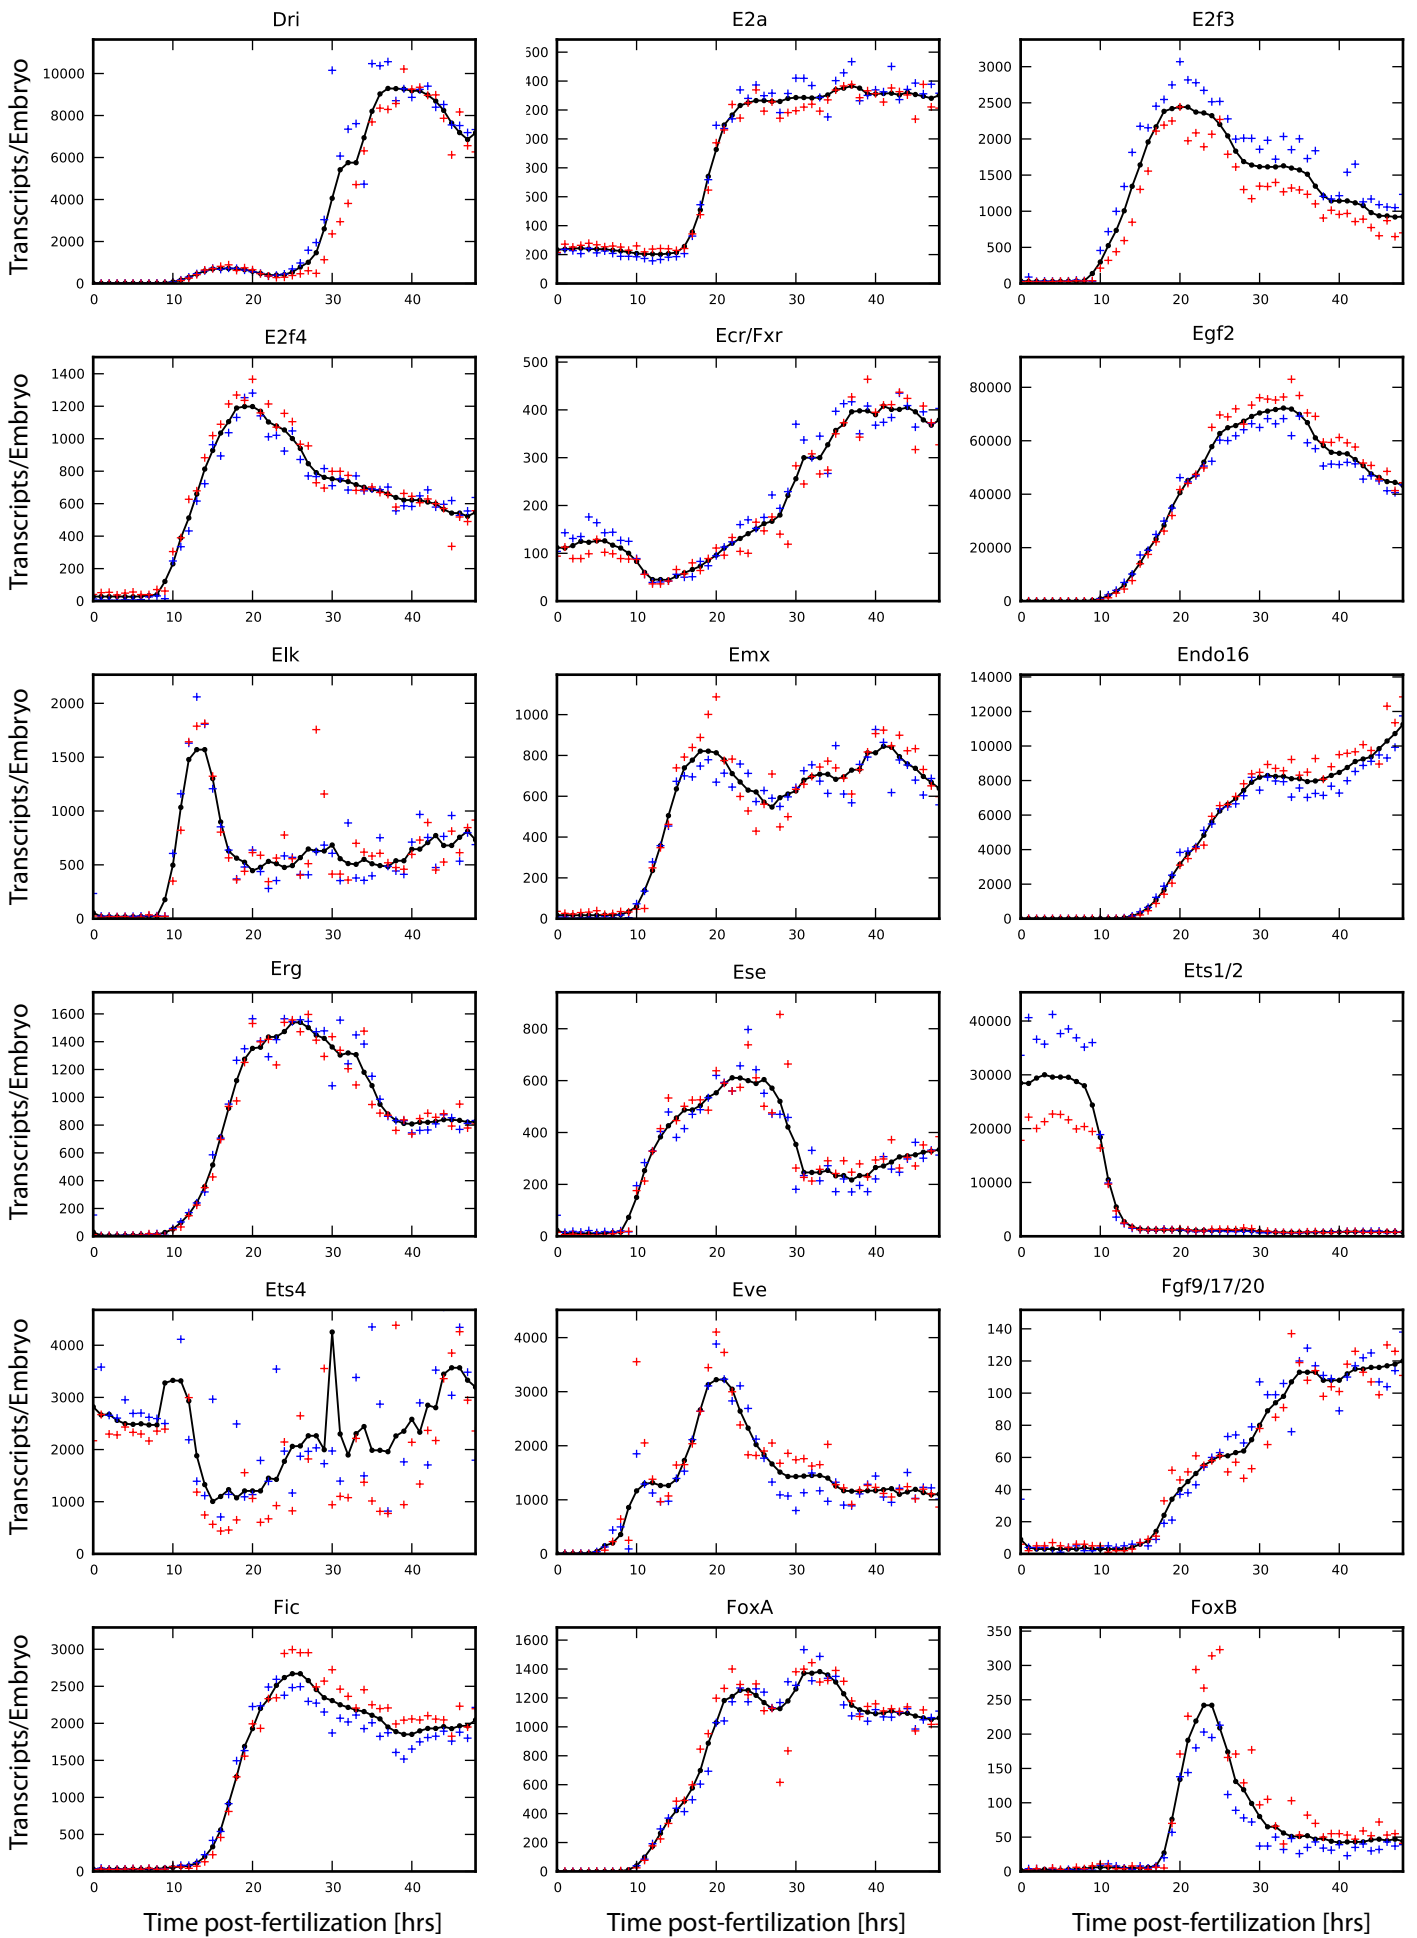

Time post-fertilization [hrs]

Time post-fertilization [hrs]

Time post-fertilization [hrs]

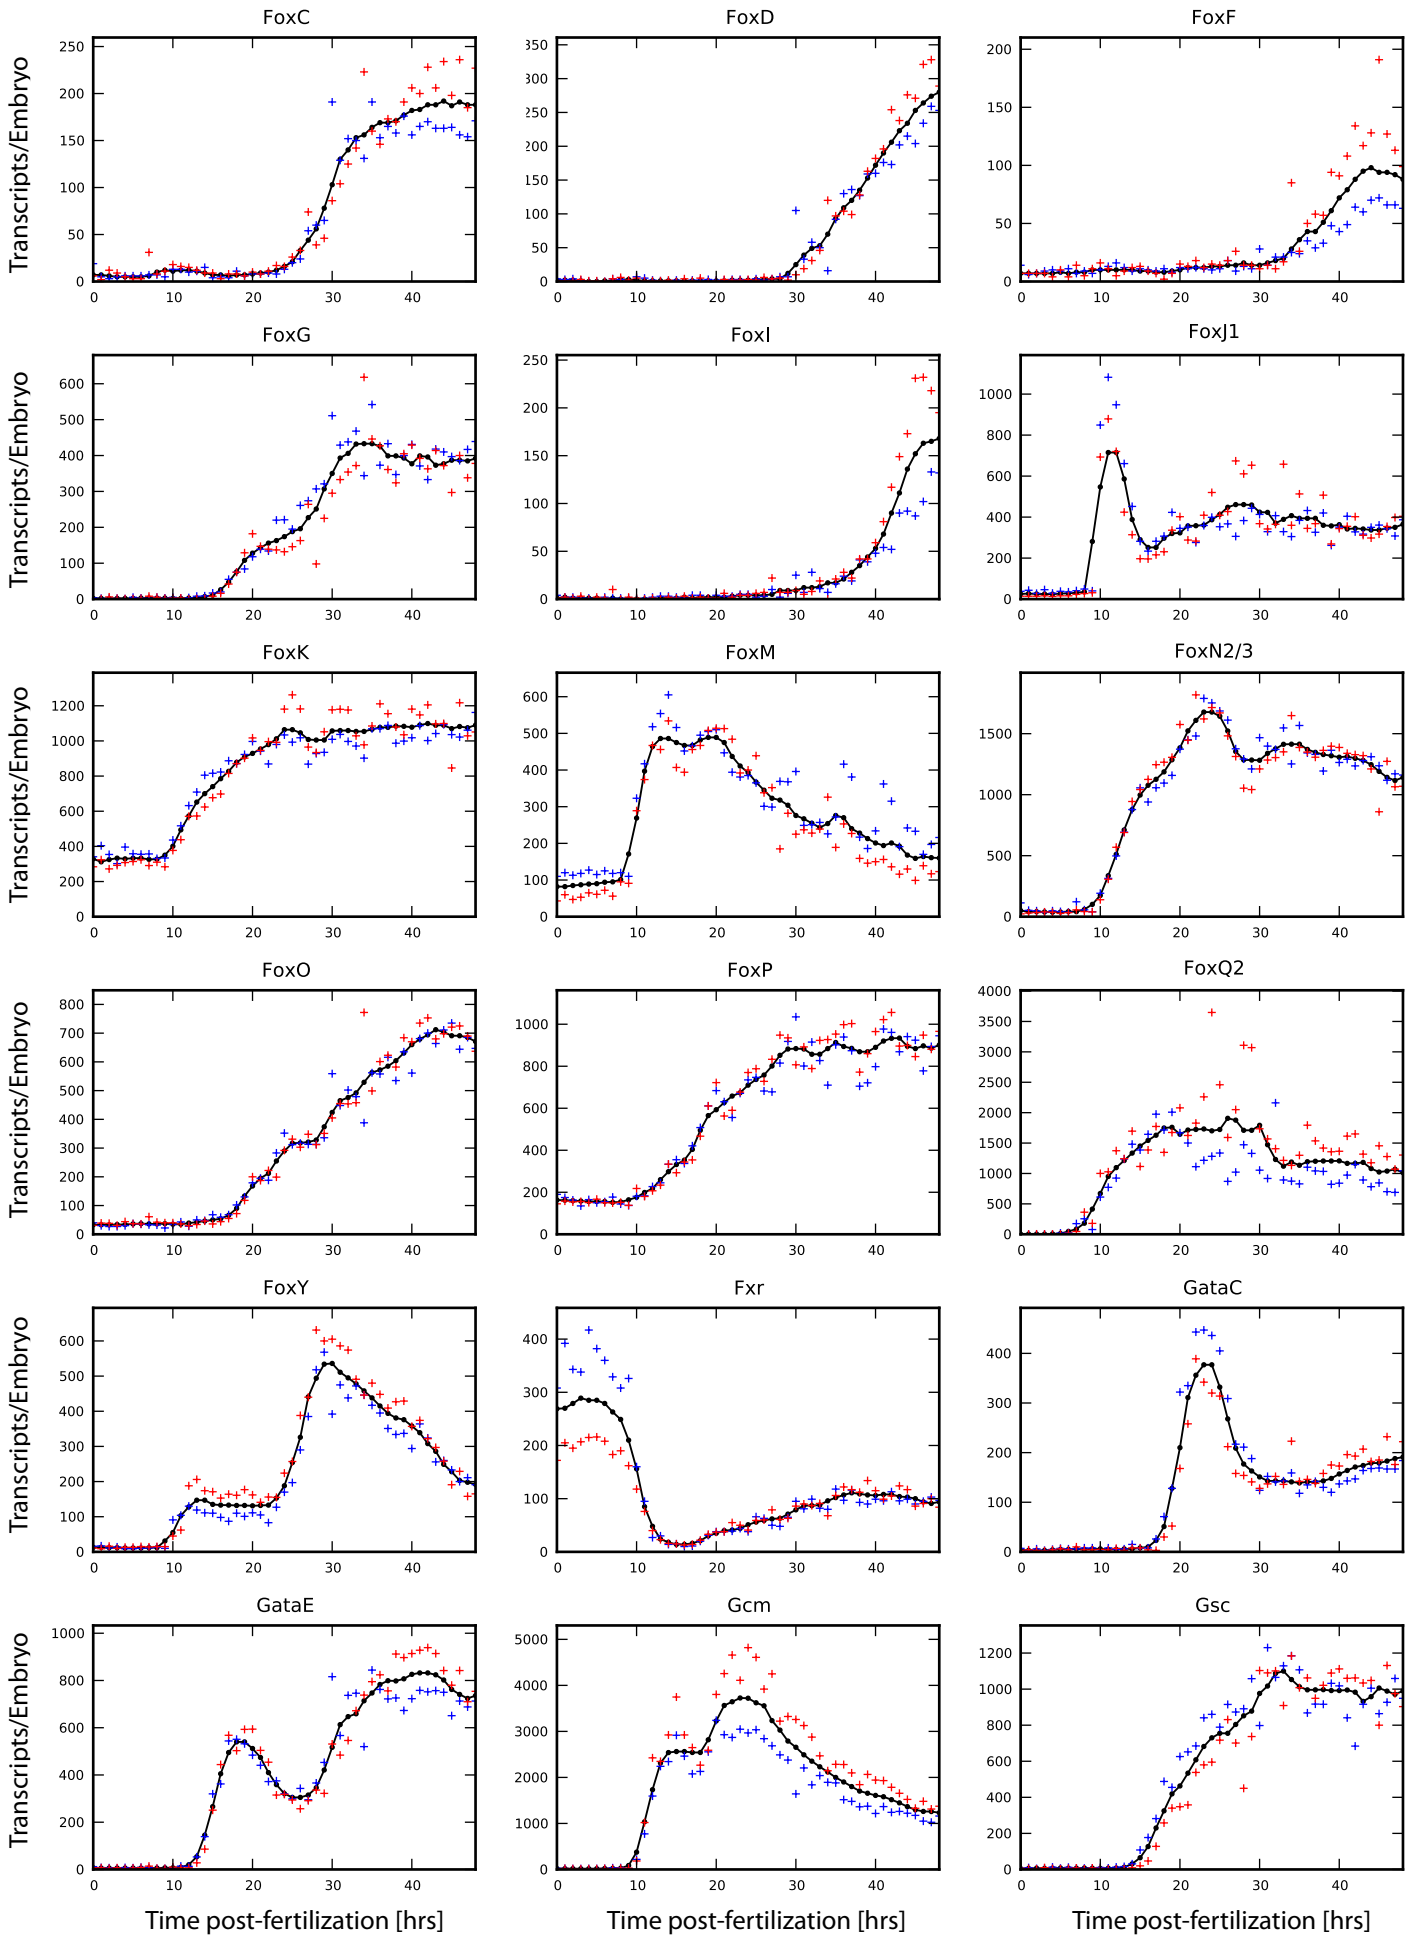

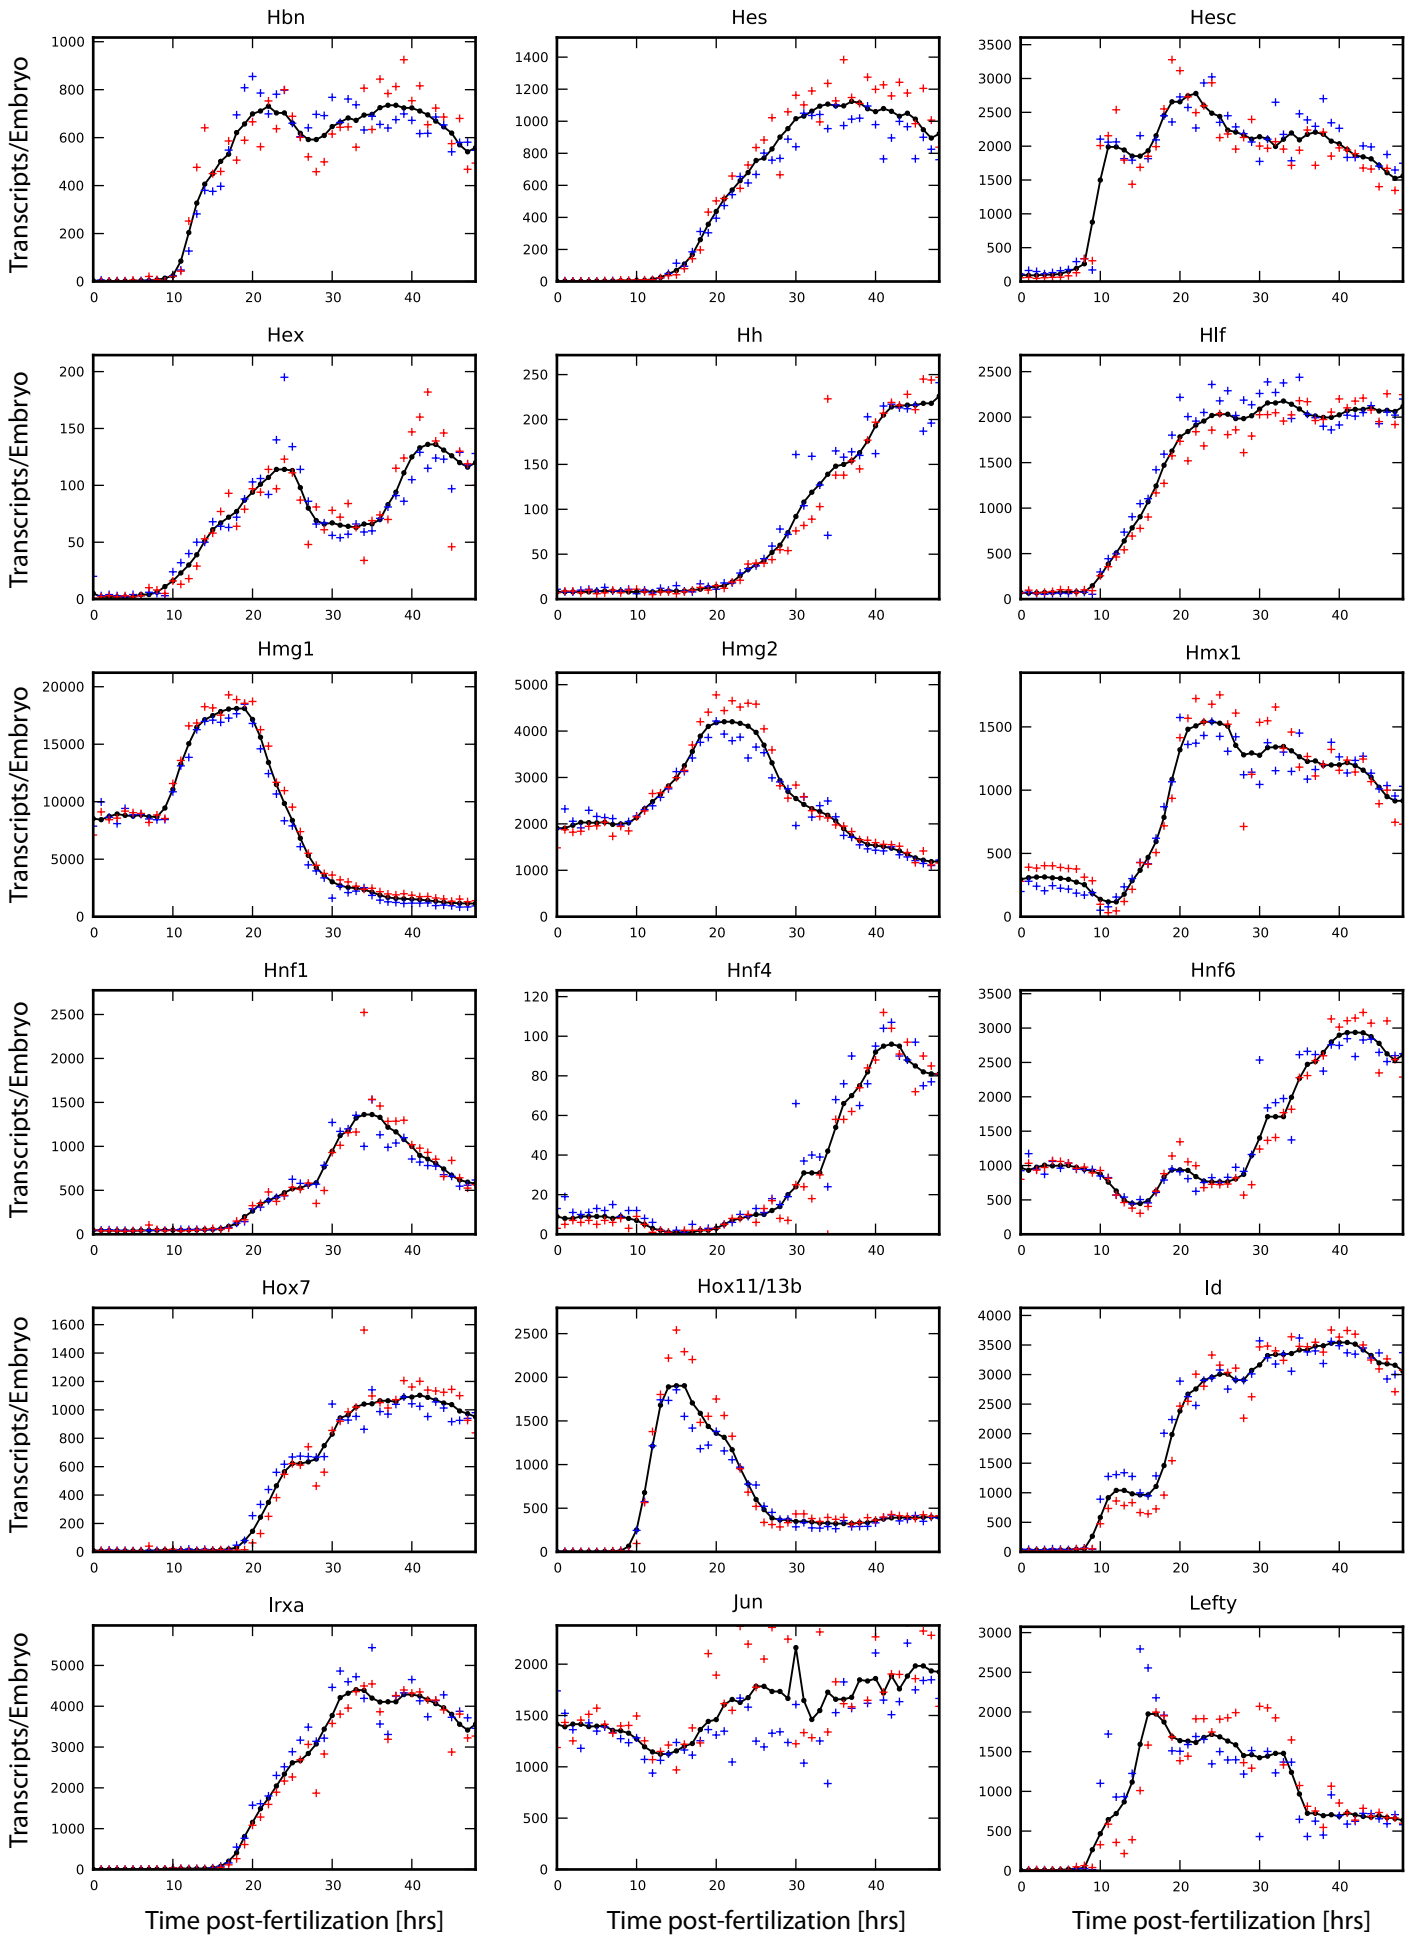

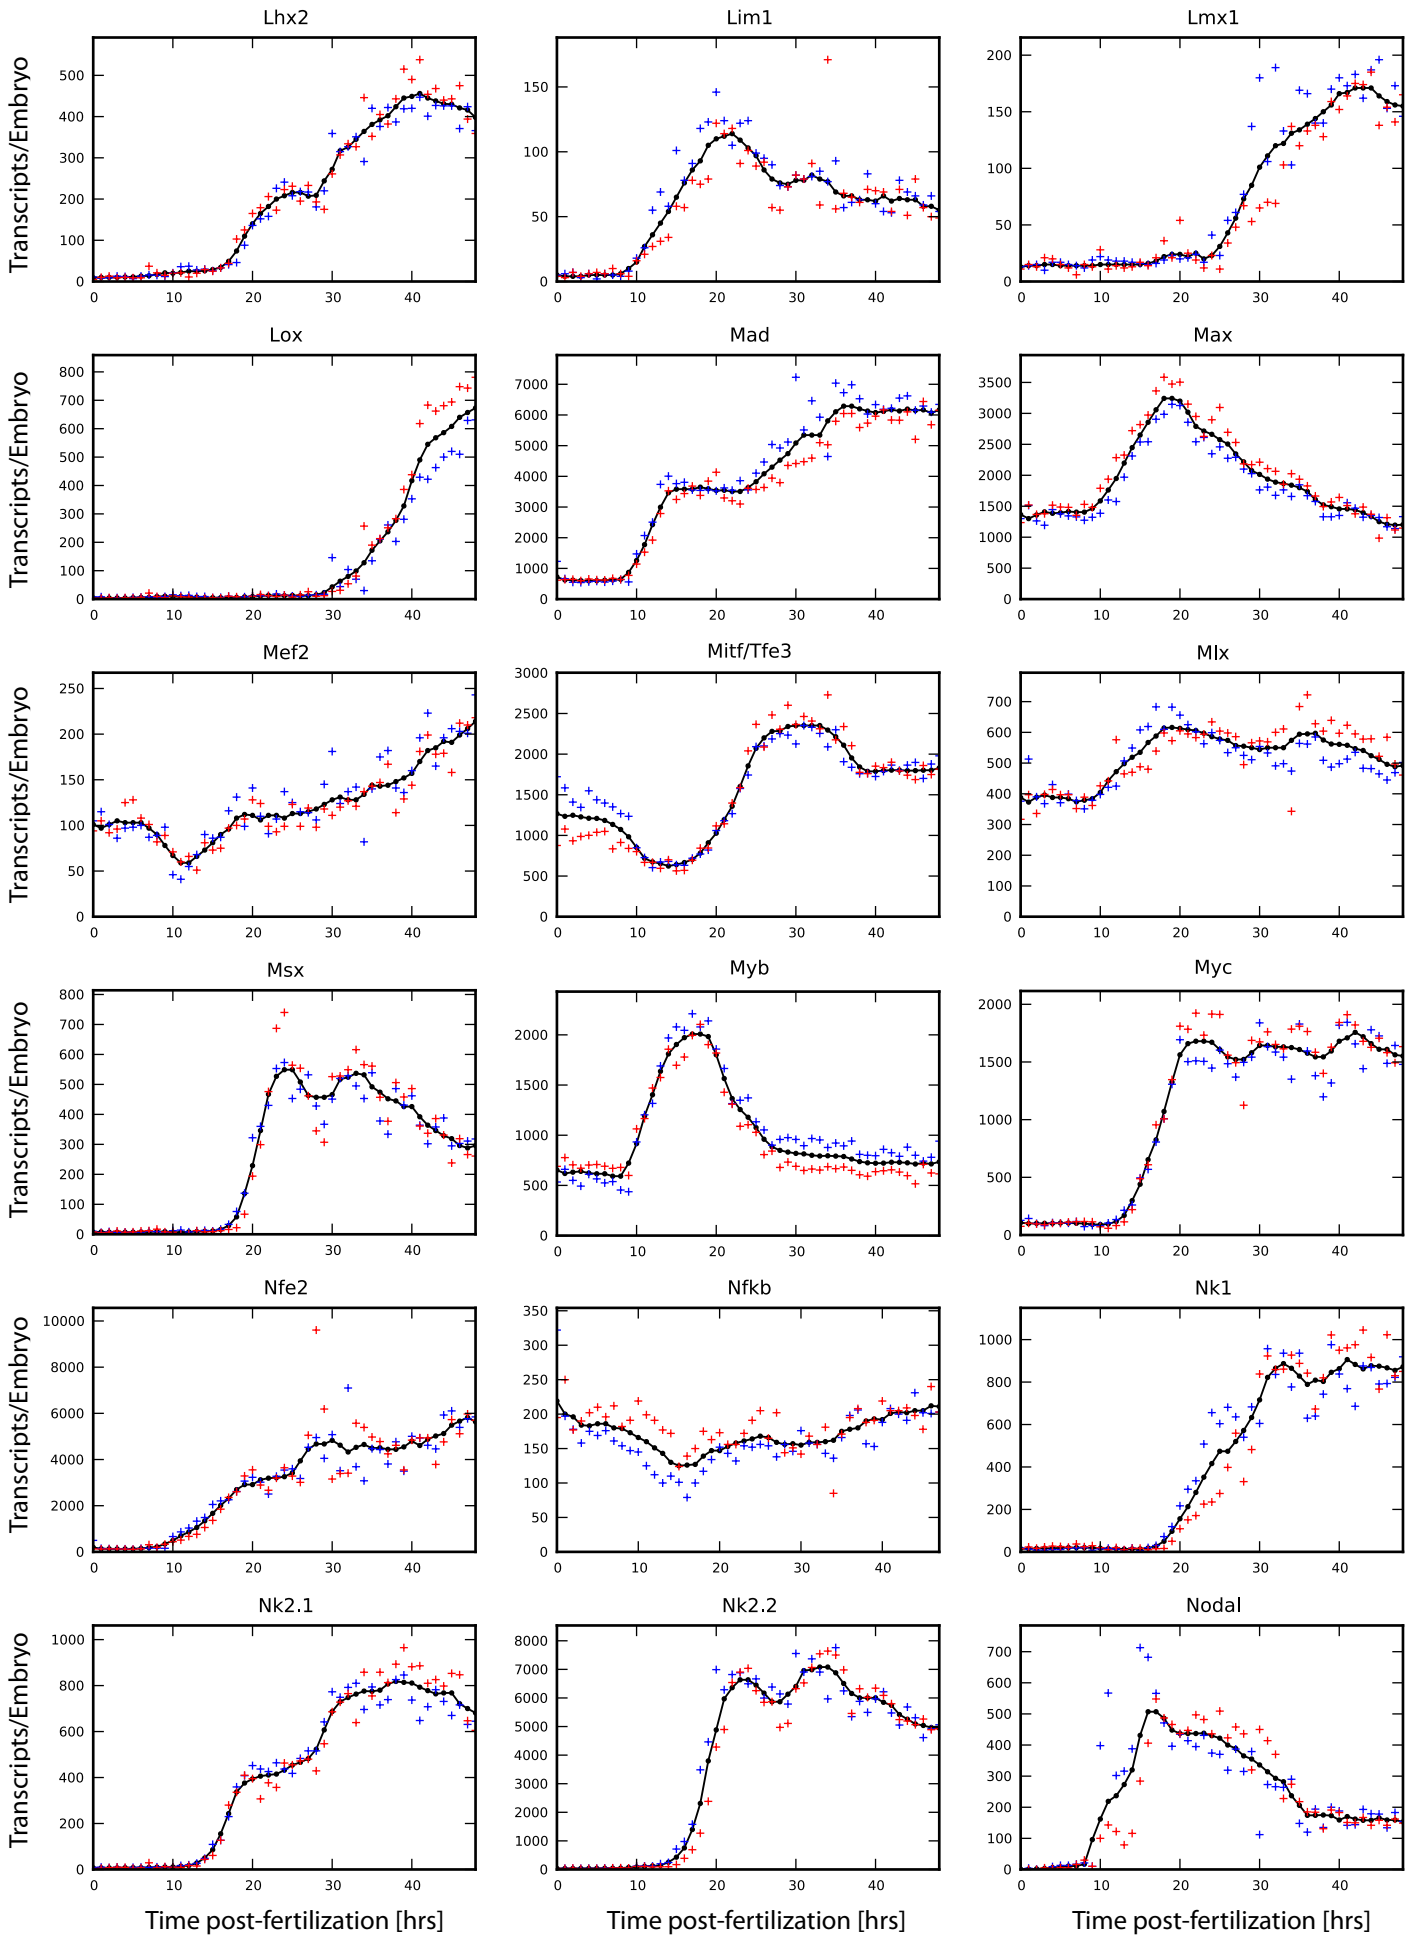

Time post-fertilization [hrs]

Time post-fertilization [hrs]

Time post-fertilization [hrs]

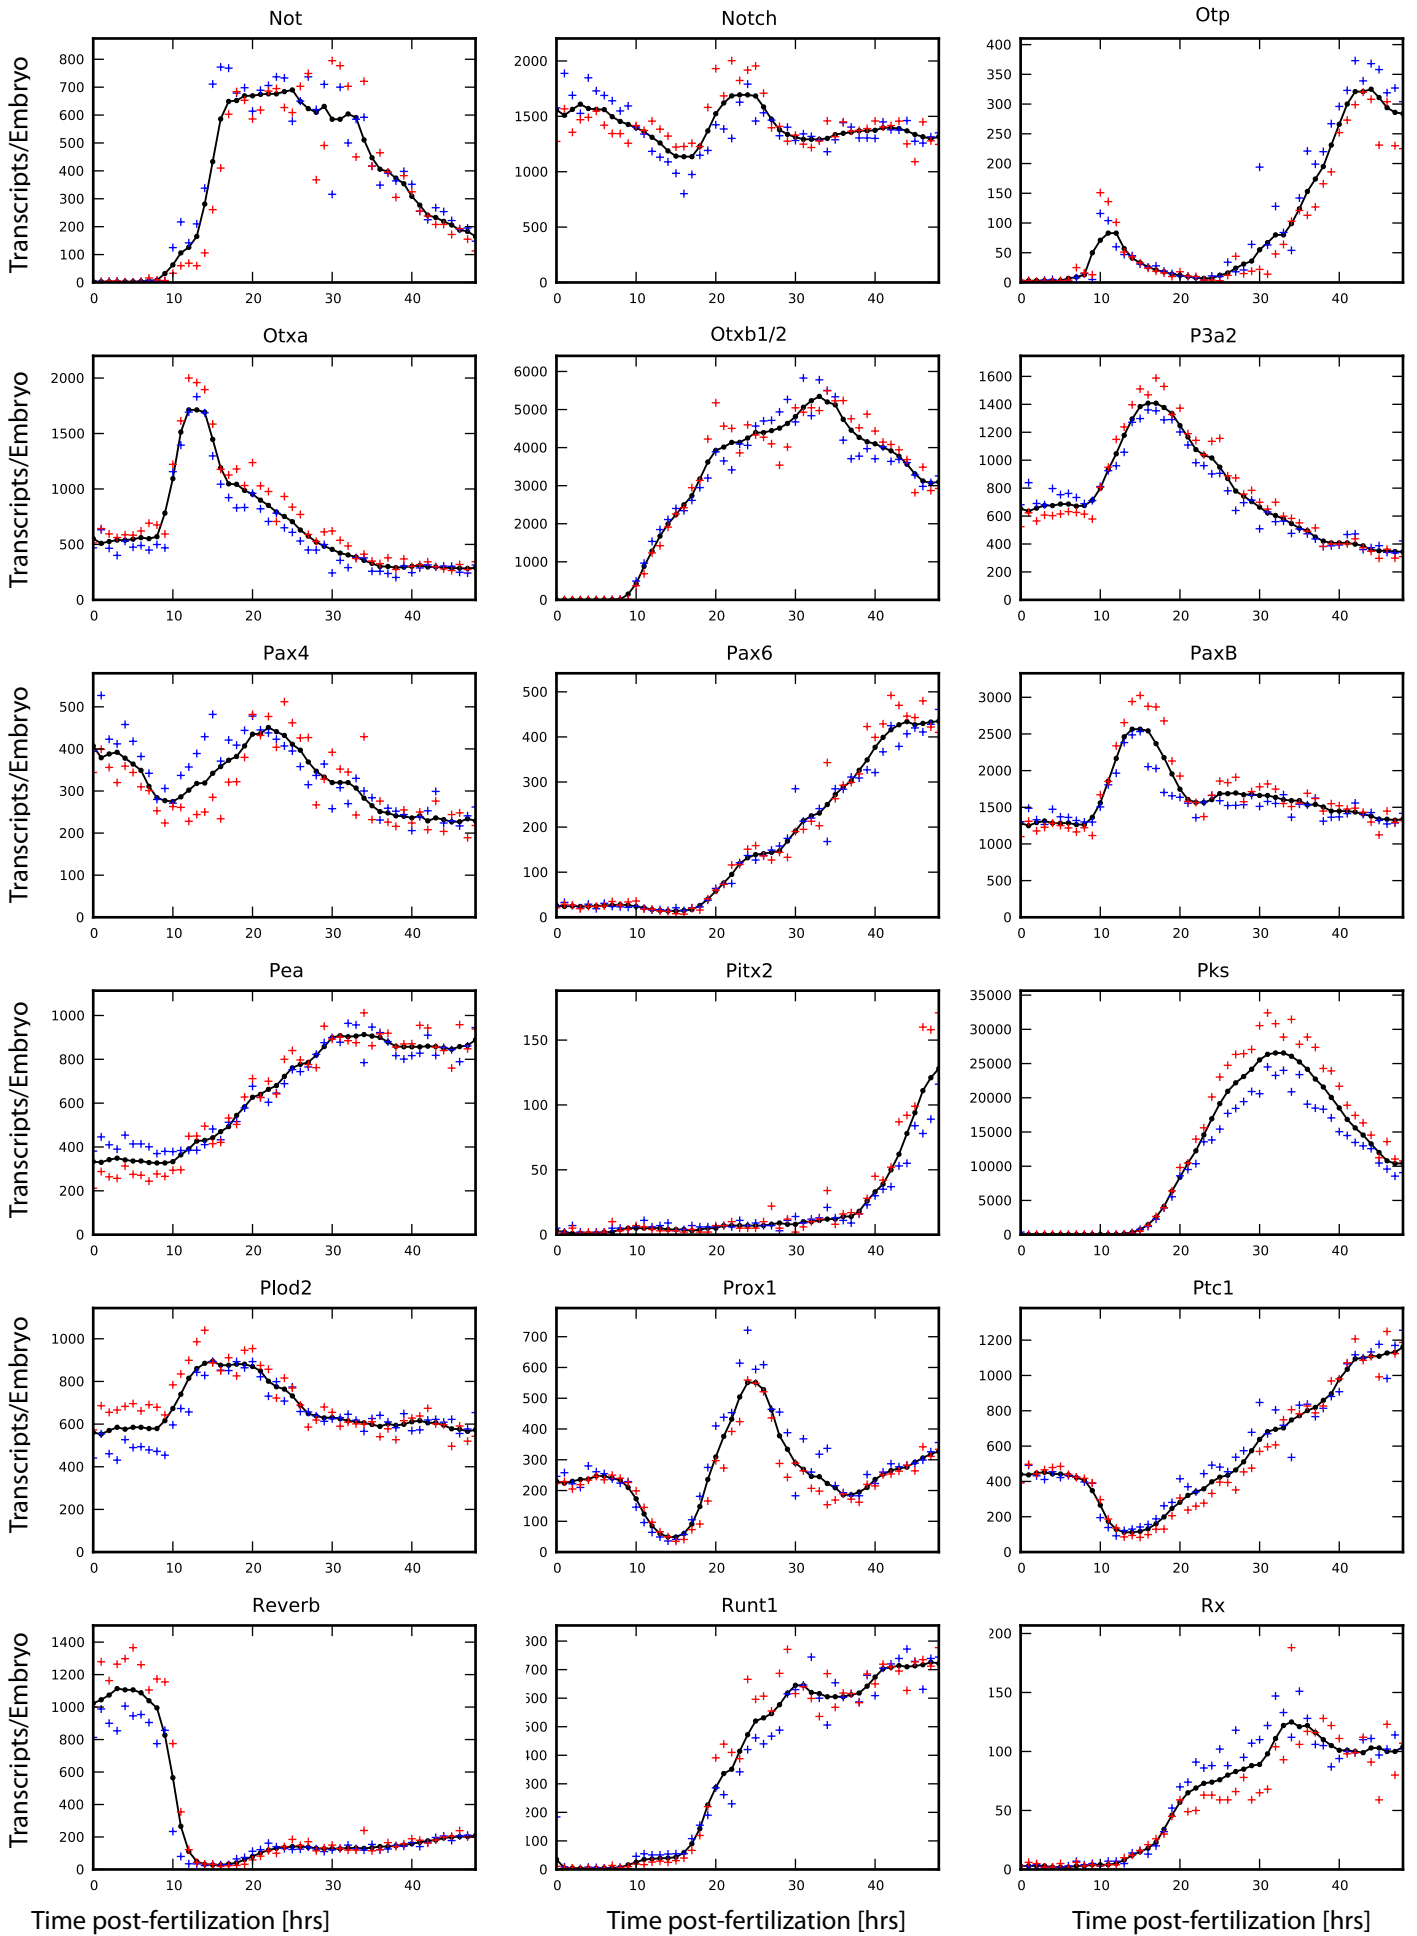

Time post-fertilization [hrs]

Time post-fertilization [hrs]

Time post-fertilization [hrs]



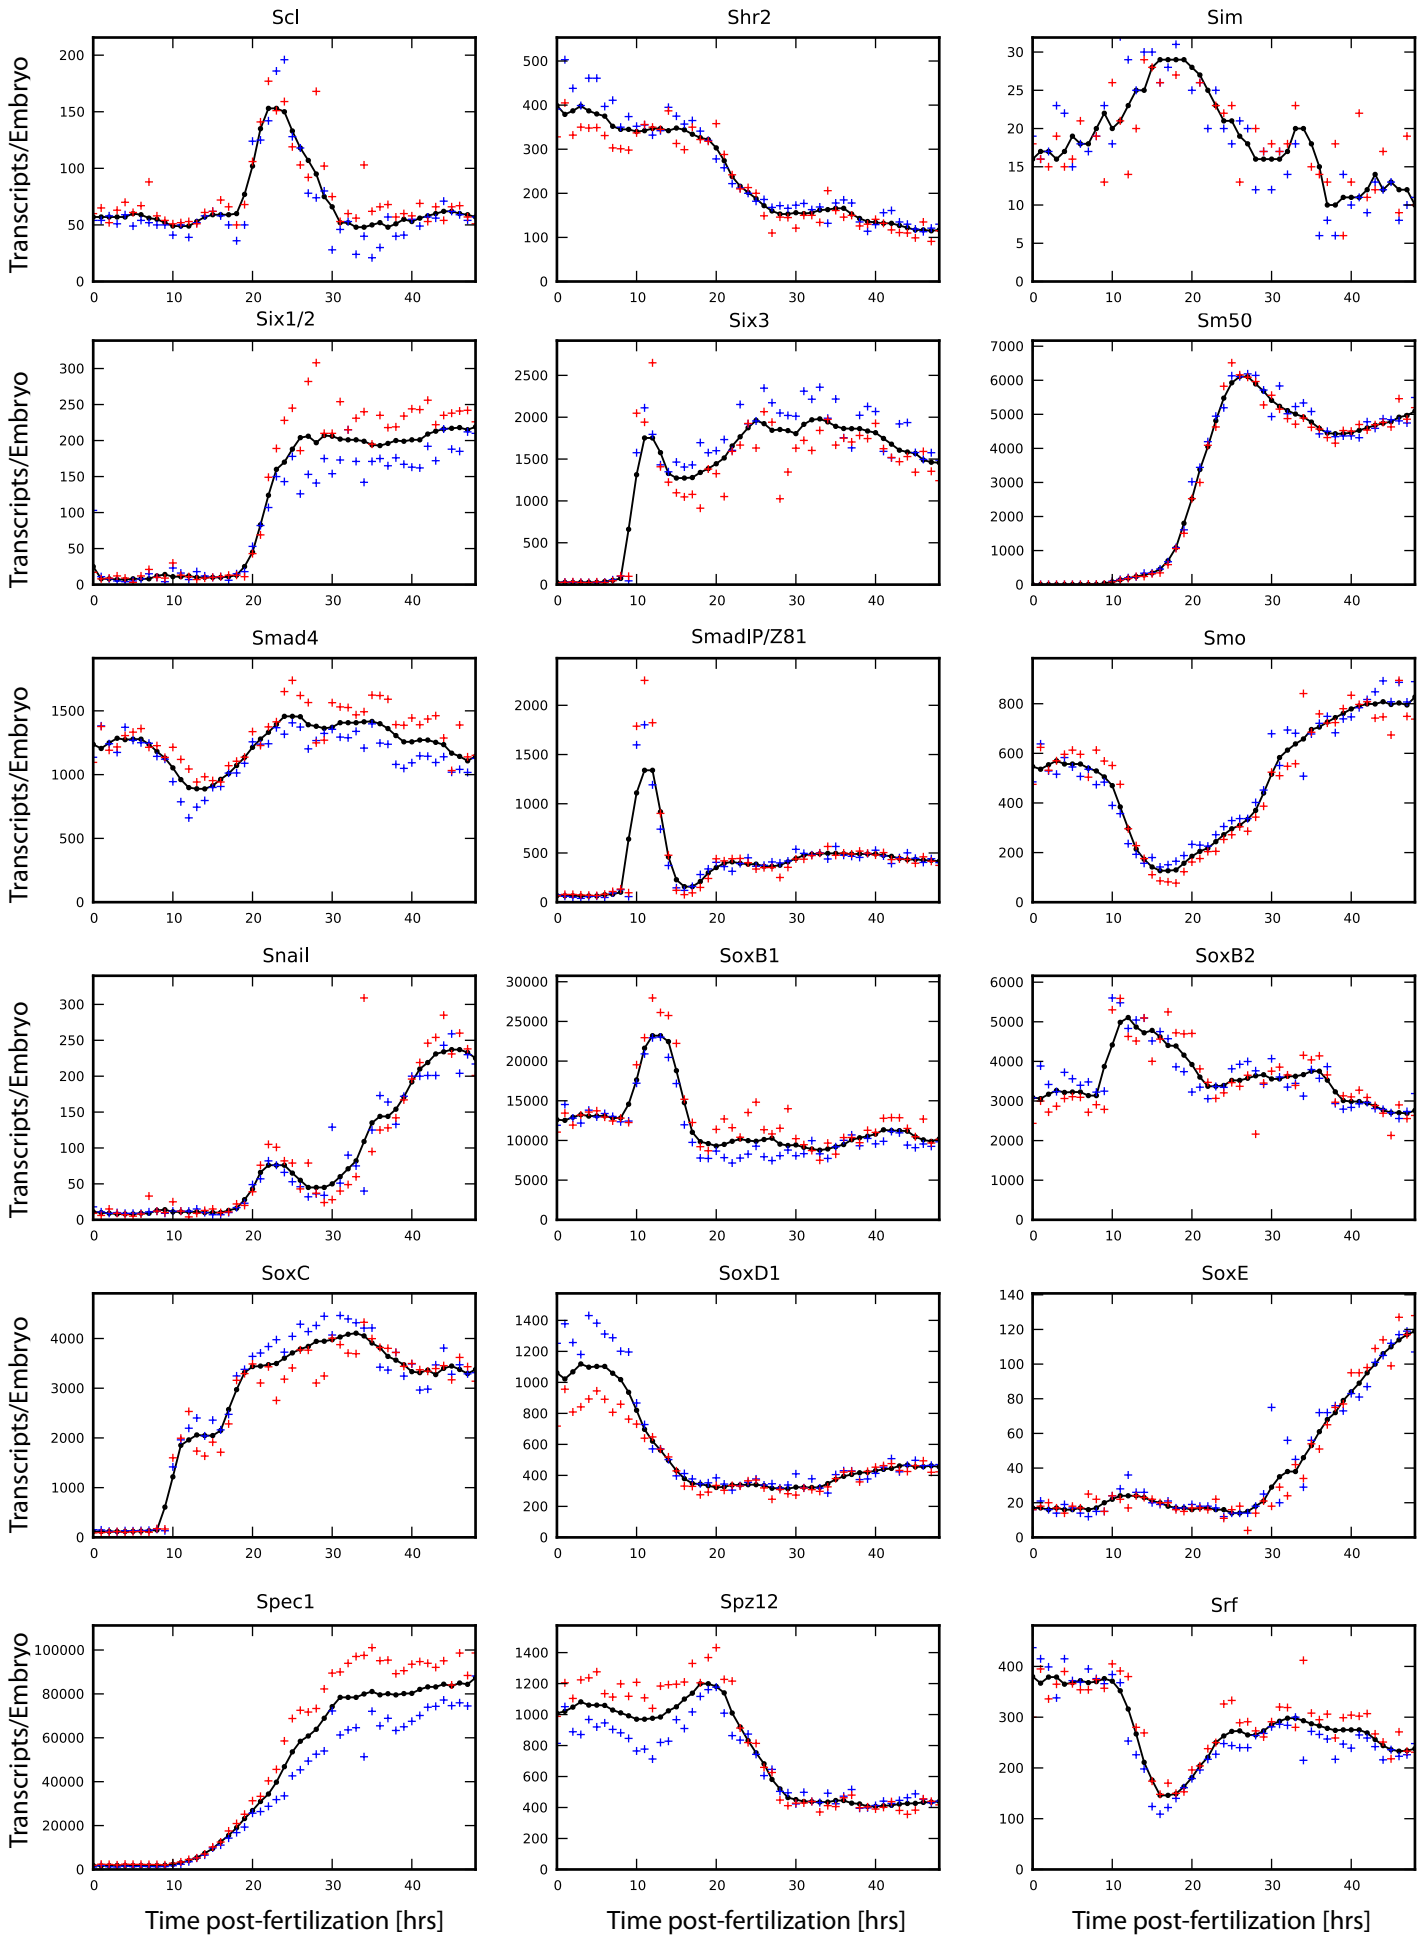

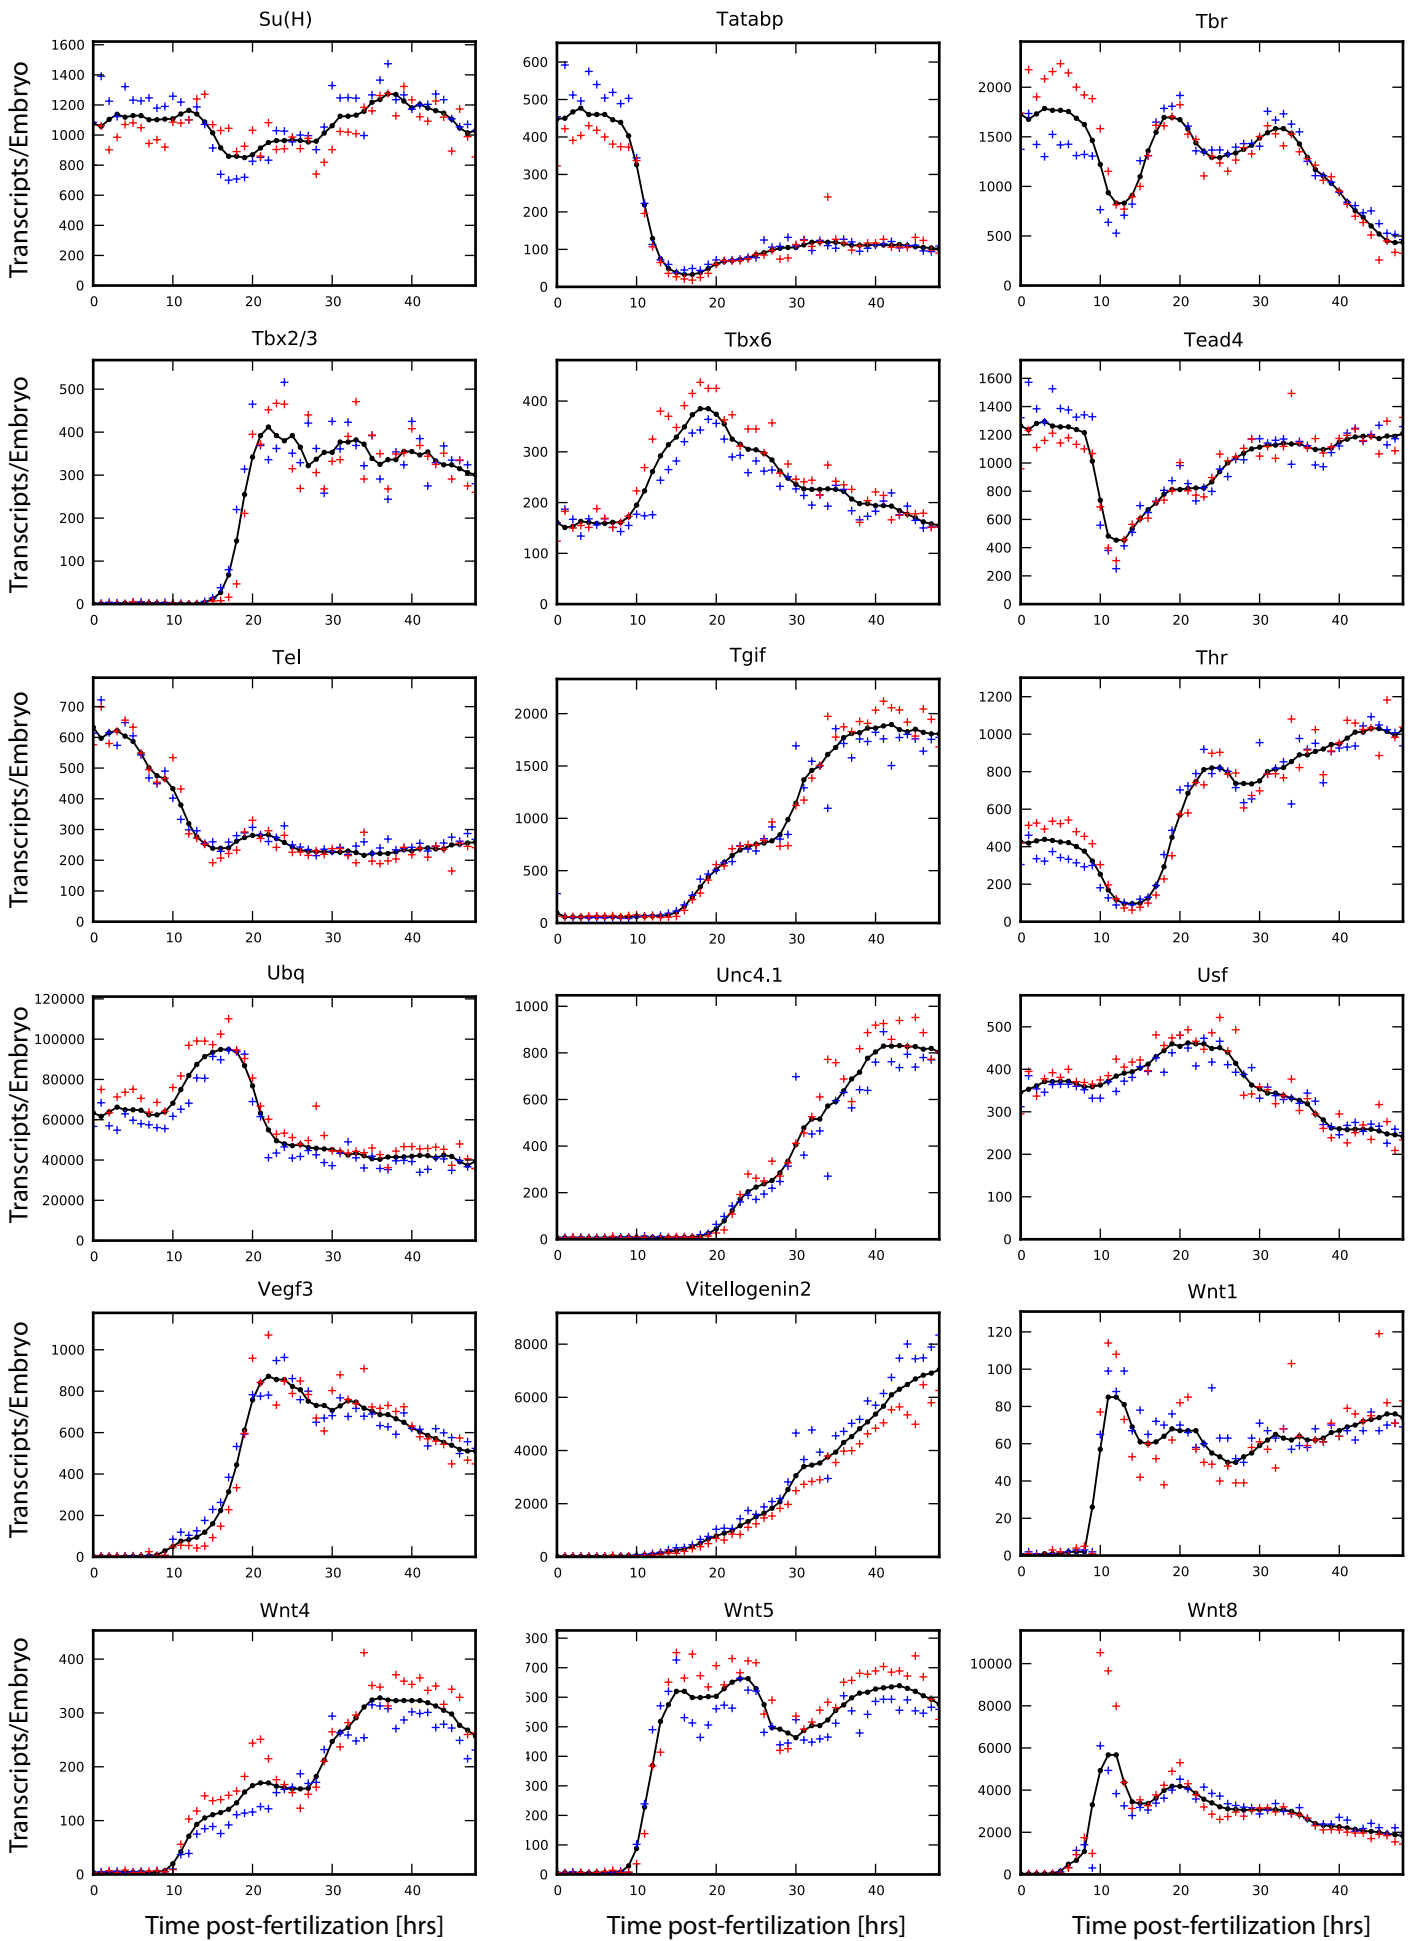

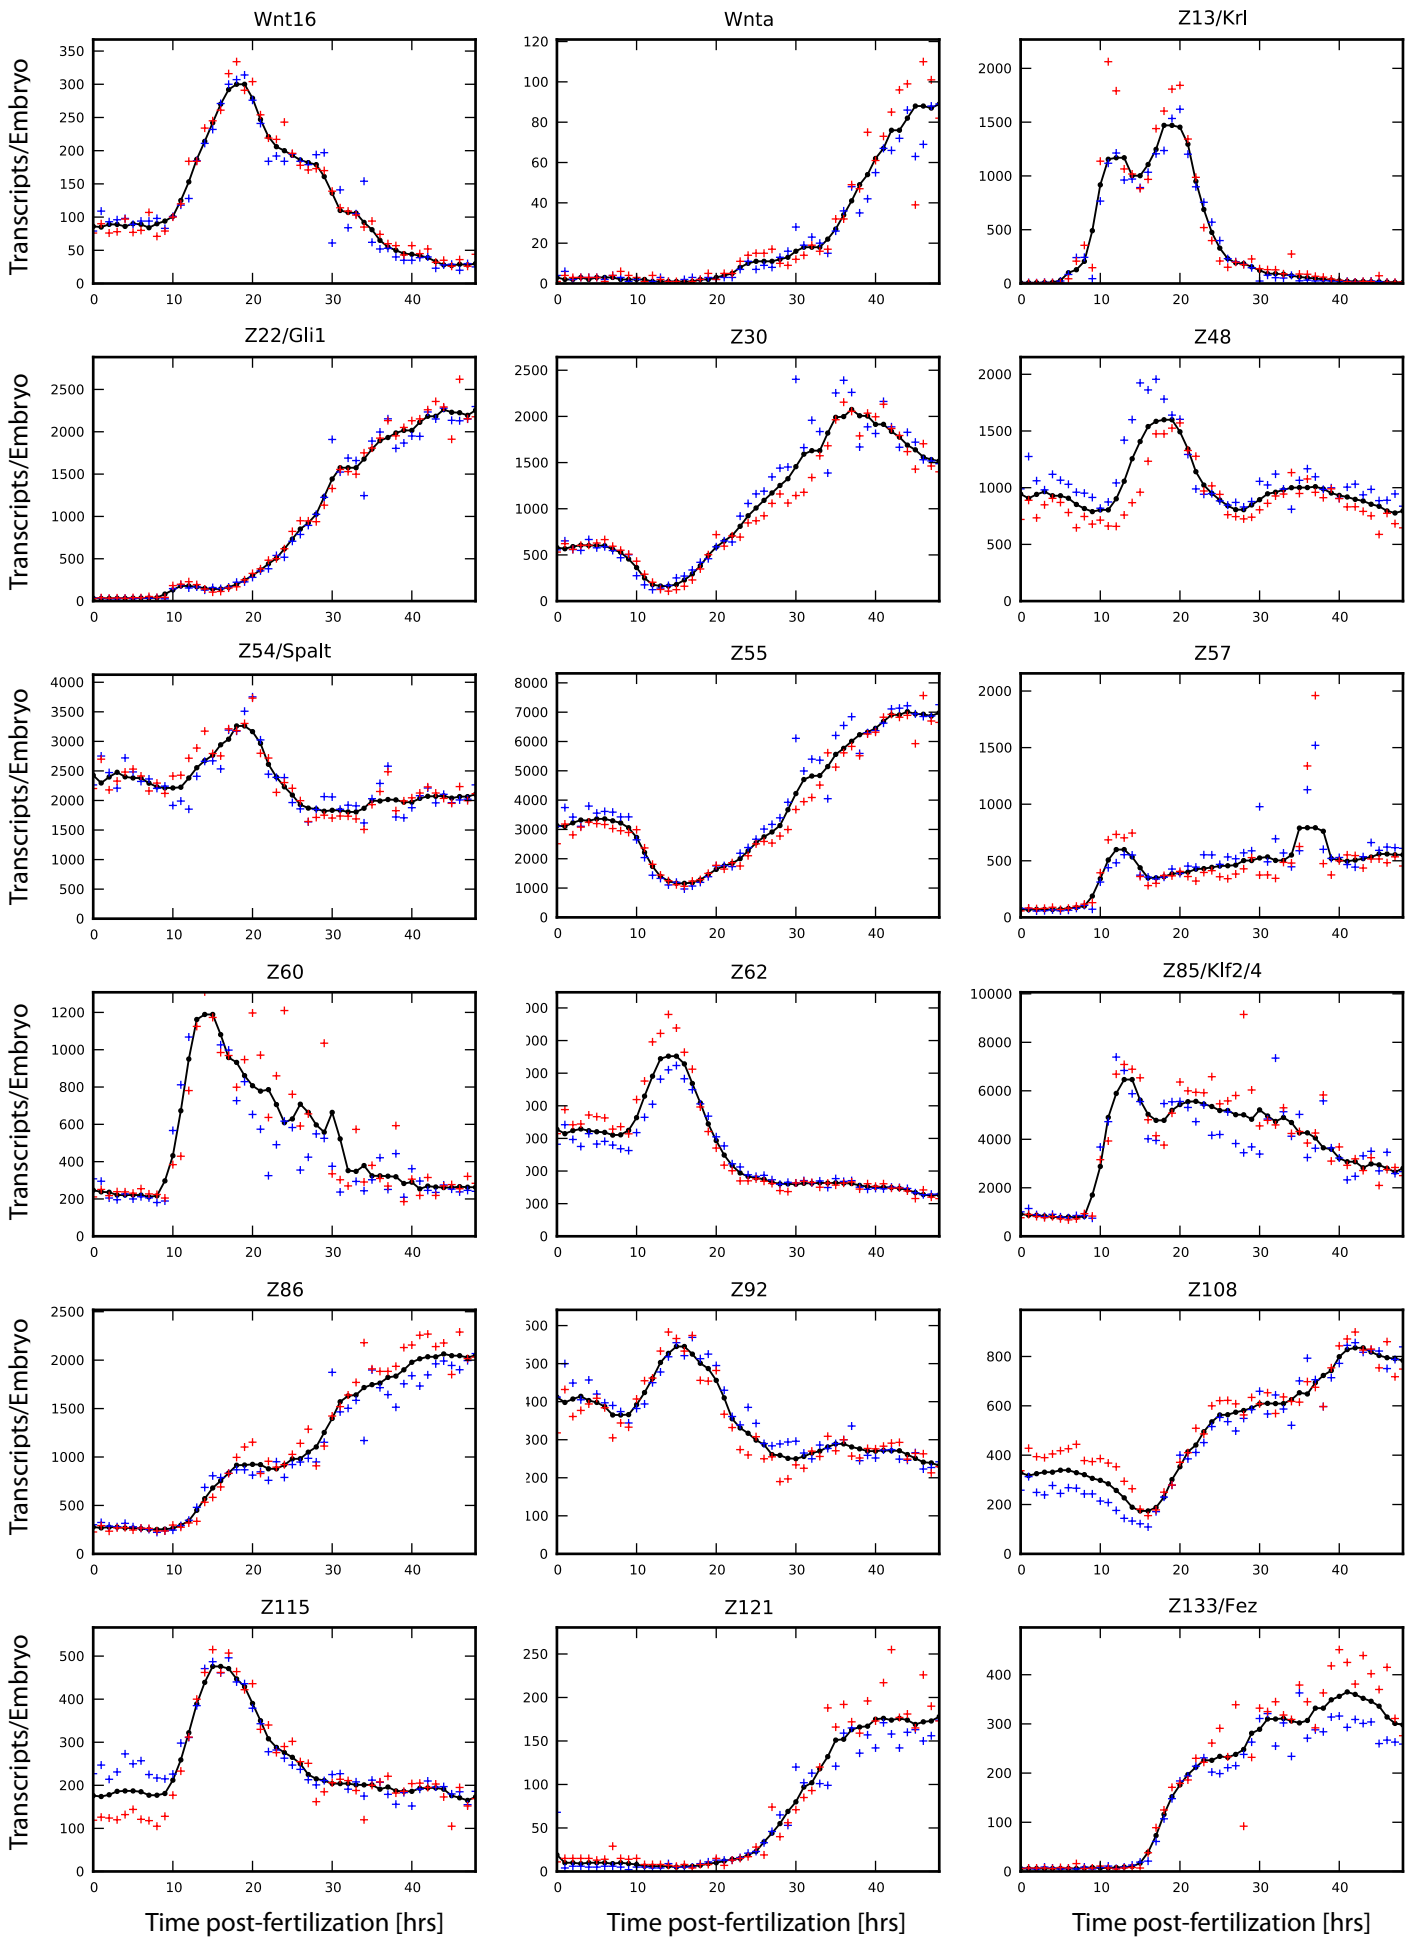

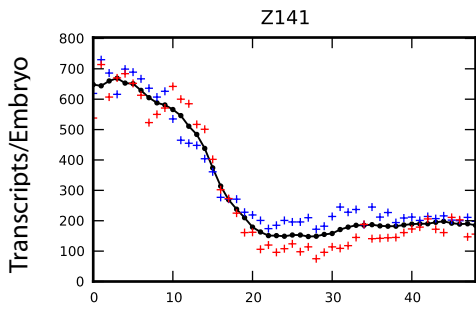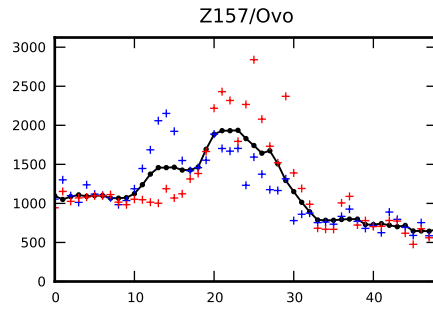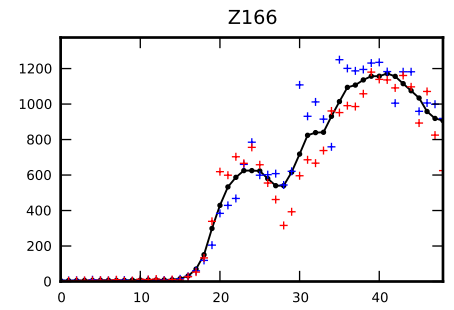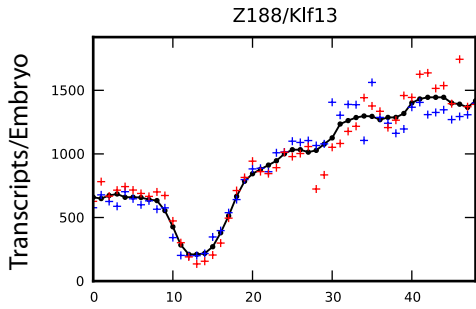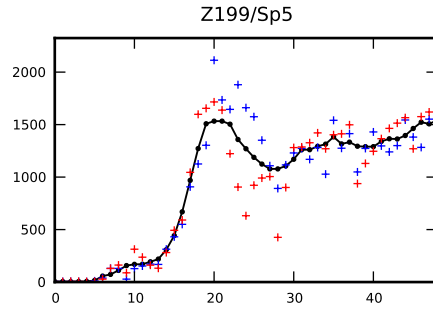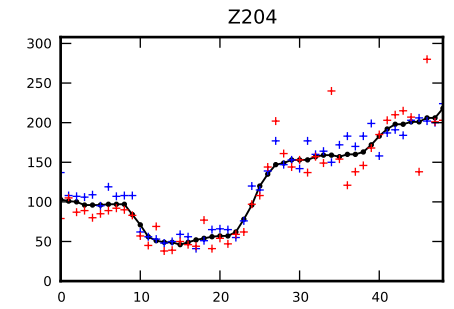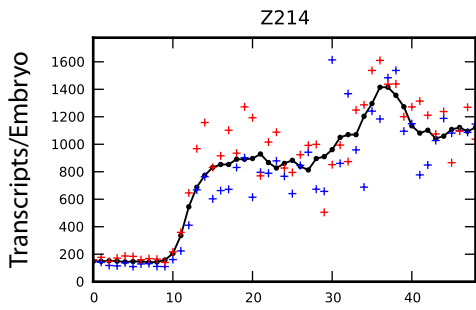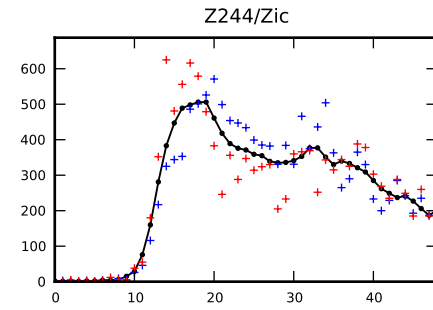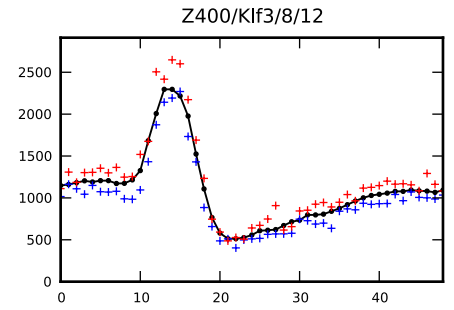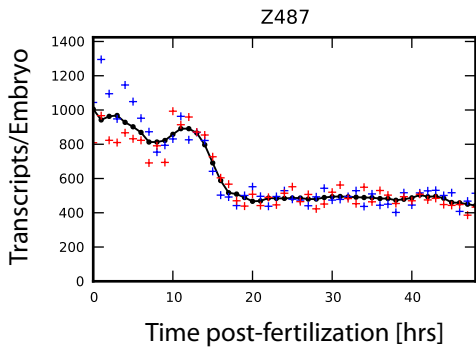

Supplement: NIHMS207743-supplement-01.pdf [file NIHMS207743-supplement-01.pdf]
